# Supplementary material
Source: MDPI journal article supplement (https://www.mdpi.com/search?q=remotesensing-10-00653)
Supplement: s001 [file remotesensing-10-00653-s001.pdf]

Article

# Global MODIS Fraction of Green Vegetation Cover for Monitoring Abrupt and Gradual Vegetation Changes

Federico Filippini <sup>1</sup>, Emiliana Valentini <sup>1,\*</sup>, Alessandra Nguyen Xuan <sup>1</sup>, Carlos A. Guerra <sup>2,3</sup>, Florian Wolf <sup>2,3</sup>, Martin Andrzejak <sup>2,3</sup> and Andrea Taramelli <sup>1,4</sup>

<sup>1</sup> Institute for Environmental Protection and Research (ISPRA), via Vitaliano Brancati 48, 00144 Roma, Italy; federico.filippini@isprambiente.it (F.F.); alessandra.nguyenxuan@isprambiente.it (A.N.X.); andrea.taramelli@isprambiente.it (A.T.)

<sup>2</sup> Institute of Biology, Martin Luther University Halle-Wittenberg, Am Kirchtor 1, 06108, Halle (Saale), Germany; carlos.guerra@idiv.de (C.A.G.); florian.wolf@idiv.de (F.W.); martin.andrzejak@ufz.de (M.A.)

<sup>3</sup> German Centre for Integrative Biodiversity Research (iDiv), Halle-Jena-Leipzig, Deutscher Platz 5E, 04103, Leipzig, Germany

<sup>4</sup> IUSS-Istituto Universitario di Studi Superiori di Pavia, Palazzo del Broletto—Piazza della Vittoria n.15, 27100 Pavia, Italy

\* Correspondence: emiliana.valentini@isprambiente.it; Tel.: +39-06-5007-4778

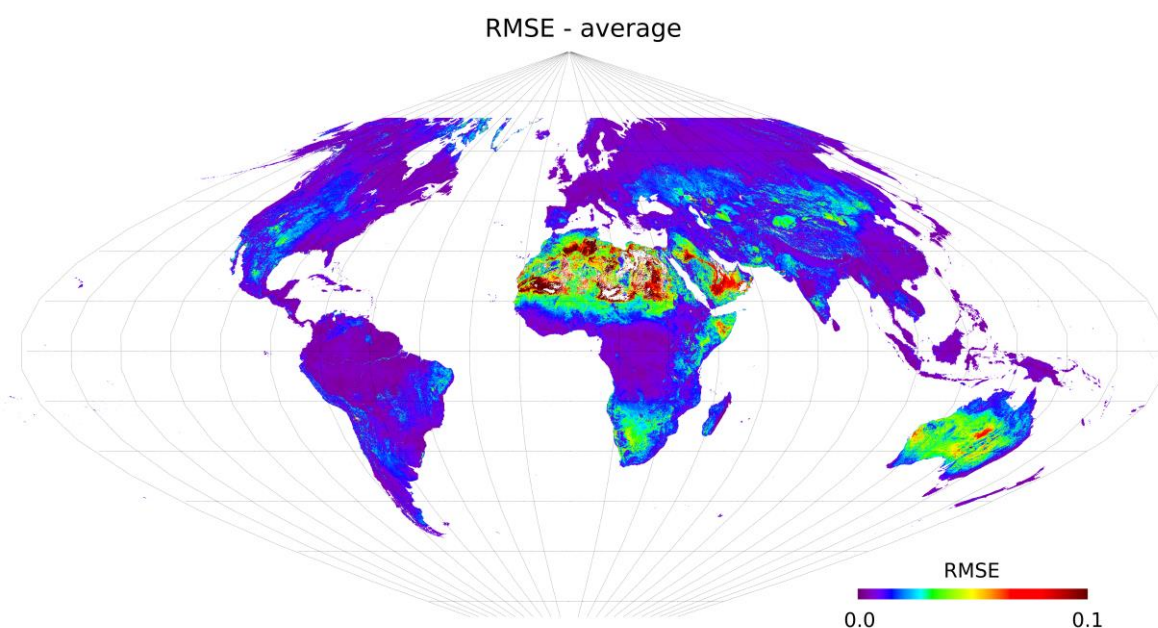

Figure S1. FCover Average RMSE

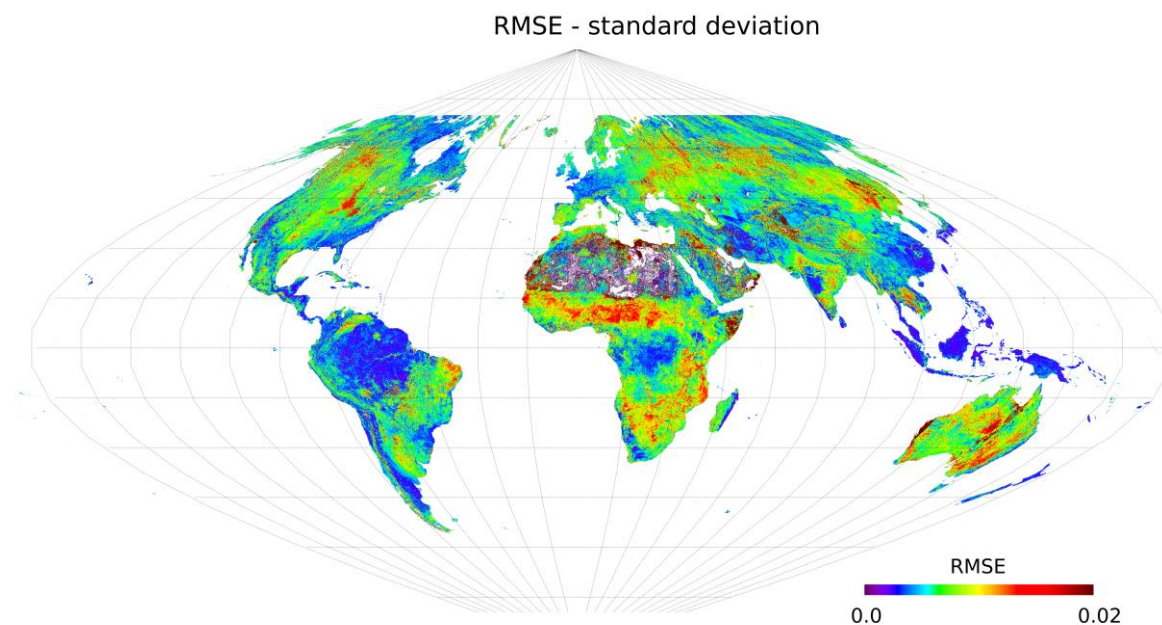

Figure S2. FCover RMSE standard deviation

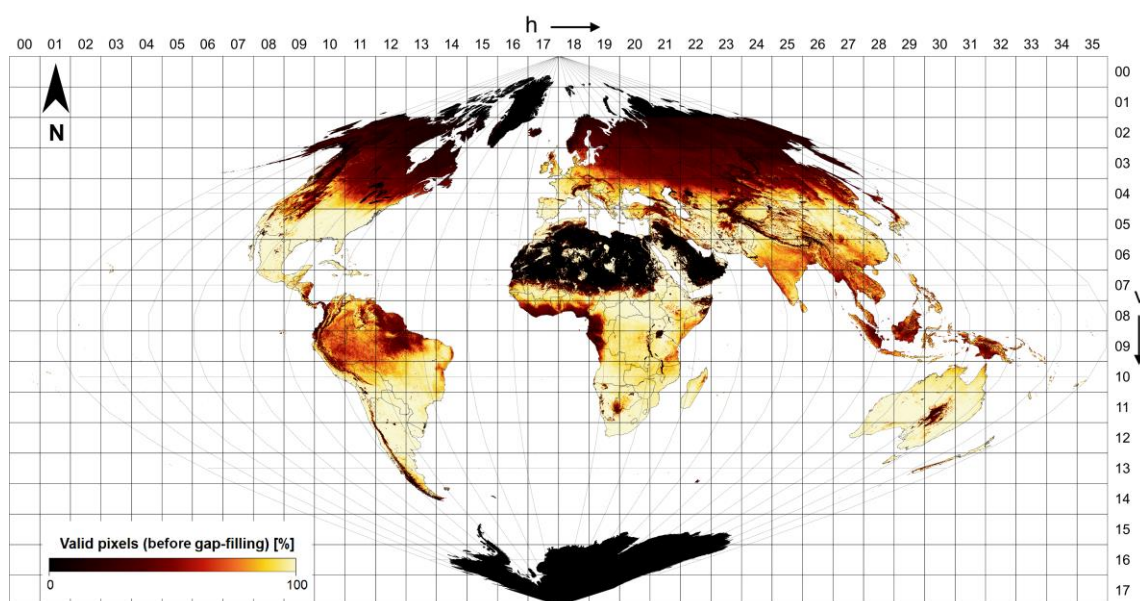

Figure S3. Percentage of valid monthly composite pixels before MODV1 gap-filling in the original MODIS tiling system in sinusoidal projection.

Table S1. Products used to build the static mask.

| Theme | Product name | Product source | Property | Data/Product reference or web link            | Spatial resolution | Temporal resolution | Reference years |
|-------|--------------|----------------|----------|-----------------------------------------------|--------------------|---------------------|-----------------|
| Ocean | LC EPOCH     | ESA            | ESA      | <a href="https://www.esa">https://www.esa</a> | 300m               | 5 years             | 2010            |

|                                  |                            |     |           |                                                                           |      |         |      |
|----------------------------------|----------------------------|-----|-----------|---------------------------------------------------------------------------|------|---------|------|
|                                  | 2010                       |     |           | -landcover-cci.o<br>rg/?q=node/158                                        |      |         |      |
| Water bodies                     | CCI<br>WaterBodies<br>v3.0 | ESA | ESA       | https://www.esa<br>-landcover-cci.o<br>rg/?q=node/169                     | 150m | 5 years | 2010 |
| Non-<br>vegetated<br>arid desert | Aridityindex               | -   | CGIAR-CSI | http://www.cgia<br>r-csi.org/data/gl<br>obal-aridity-and<br>-pet-database | 1km  | Na      | Na   |
| Large urban<br>areas             | LC EPOCH<br>2010           | ESA | ESA       | https://www.esa<br>-landcover-cci.o<br>rg/?q=node/158                     | 300m | 5 years | 2010 |

**Table S2.** Information from the monthly VI Quality detailed QA layer used to build the dynamic mask.

| Long Name         | Key                                                 |
|-------------------|-----------------------------------------------------|
| MODLAND_QA        | Pixel produced but most probably cloudy             |
|                   | Pixel not produced due to other reasons than clouds |
| VI usefulness     | Lowest quality                                      |
|                   | Quality so low that it is not useful                |
|                   | L1B data faulty                                     |
|                   | Not useful for any other reason/not processed       |
| Land/Water Flag   | Shallow ocean                                       |
|                   | Ocean coastlines and lake shorelines                |
|                   | Shallow inland water                                |
|                   | Ephemeral water                                     |
|                   | Deep inland water                                   |
|                   | Moderate or continental ocean                       |
|                   | Deep ocean                                          |
| Possible snow/ice | Yes                                                 |
| Possible shadow   | Yes                                                 |

**Table S3.** Information from the monthly pixel reliability summary QA layer used to build the dynamic mask.

| Summary QA | Description |
|------------|-------------|
|------------|-------------|

|               |                                          |
|---------------|------------------------------------------|
| Fill/No Data  | Not Processed                            |
| Good Data     | Use with confidence                      |
| Marginal data | Useful, but look at other QA information |
| Snow/Ice      | Target covered with snow/ice             |
| Cloudy        | Target not visible, covered with cloud   |

**Table S4.** Description of quality flags associated with each FCover monthly tile.

| bit | name                 | description                                                | value | key                 |
|-----|----------------------|------------------------------------------------------------|-------|---------------------|
| 0   | STATIC_MASK          | Pixel is masked from auxiliary thematic maps               | 0     | pixel with values   |
|     |                      |                                                            | 1     | masked pixel        |
| 1   | BRIGHT               | Pixel is extremely bright                                  | 0     | in range            |
|     |                      |                                                            | 1     | pixel is too bright |
| 2   | INVALID_TEMP_PROFILE | Pixel temporal profile has less than 70% valid pixels      | 0     | valid               |
|     |                      |                                                            | 1     | invalid             |
| 3   | INTERPOLATED         | Pixel is gap-filled using DINEOF                           | 0     | not filled          |
|     |                      |                                                            | 1     | filled              |
| 4   | SNOW_ICE             | Pixel is covered by snow or ice                            | 0     | not covered         |
|     |                      |                                                            | 1     | covered by snow/ice |
| 5   | LAND                 | Pixel is land                                              | 0     | no land             |
|     |                      |                                                            | 1     | land                |
| 6   | INCOMPLETE           | Pixel temporal profile contains at least one missing value | 0     | complete            |
|     |                      |                                                            | 1     | incomplete          |
| 7   | VALID                | Pixel is valid                                             | 0     | invalid             |
|     |                      |                                                            | 1     | valid               |

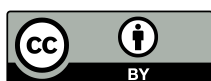

© 2018 by the authors. Submitted for possible open access publication under the terms and conditions of the Creative Commons Attribution (CC BY) license (<http://creativecommons.org/licenses/by/4.0/>).
